# Supplementary material for: Phenotype of White Sika Deer Due to SCF Gene Structural Variation
Source: MDPI journal article supplement (doi:10.3390/genes14051035), 2023-05-02
Supplement: s1 [file s1]

Table S1 List of candidate genomes

| Gene  | function                                                         |
|-------|------------------------------------------------------------------|
| KIT   | Mast/stem_cell_growth_factor_receptor_Kit                        |
| CORIN | Atrial_natriuretic_peptide-converting_enzyme                     |
| AP3B1 | AP-3_complex_subunit_beta-1                                      |
| HPS6  | Hermansky-Pudlak_syndrome_6_protein_homolog                      |
| HPS1  | Hermansky-Pudlak_syndrome_1_protein                              |
| MC1R  | Melanocyte-stimulating_hormone_receptor                          |
| TYRP2 | L-dopachrome_tautomerase                                         |
| EDNRB | Endothelin_B_receptor                                            |
| HPS4  | Hermansky-Pudlak_syndrome_4_protein                              |
| HPS4  | Hermansky-Pudlak_syndrome_4_protein                              |
| AP3D1 | AP-3_complex_subunit_delta-1                                     |
| TYR   | Tyrosinase                                                       |
| HPS5  | Hermansky-Pudlak_syndrome_5_protein                              |
| CDC42 | Cell_division_control_protein_42_homolog                         |
| SOX5  | Transcription_factor_SOX-5                                       |
| WRN   | Werner_syndrome_ATP-dependent_helicase                           |
| DKK3  | Dickkopf-related_protein_3                                       |
| COPB  | Coatomer_subunit_beta                                            |
| TIMP3 | Metalloproteinase_inhibitor_3                                    |
| PTPRT | Receptor-type_tyrosine-protein_phosphatase_T                     |
| ASIP  | Agouti-signaling_protein                                         |
| ALX3  | Homeobox_protein_aristaless-like_3                               |
| PMEL  | Melanocyte_protein_PMEL                                          |
| VDR   | Vitamin_D3_receptor                                              |
| MITF  | Microphthalmia-associated_transcription_factor                   |
| HPS3  | Hermansky-Pudlak_syndrome_3_protein                              |
| TRPM1 | Transient_receptor_potential_cation_channel_subfamily_M_member_1 |
| GGT1  | Gamma-glutamyltranspeptidase_1                                   |
| DSG4  | Desmoglein-4                                                     |
| TRPM7 | Transient_receptor_potential_cation_channel_subfamily_M_member_7 |
| MYO5A | Unconventional_myosin-Va                                         |
| IRF4  | Interferon_regulatory_factor_4                                   |
| EXOC2 | Exocyst_complex_component_2                                      |
| WNT3A | Protein_Wnt-3a                                                   |
| PTPRF | Receptor-type_tyrosine-protein_phosphatase_F                     |
| COPA  | Coatomer_subunit_alpha                                           |
| ATP7A | Copper-transporting_ATPase_1                                     |
| EDN3  | Endothelin-3                                                     |
| TYRP1 | 5,6-dihydroxyindole-2-carboxylic_acid_oxidase                    |
| PAX3  | Paired_box_protein_Pax-3                                         |
| MEF2C | Myocyte-specific_enhancer_factor_2C                              |
| AP3D1 | AP-3 complex subunit delta-1                                     |

---

|            |                                                                   |
|------------|-------------------------------------------------------------------|
| AP3B1      | AP-3 complex subunit beta-1                                       |
| AP3B2      | AP-3 complex subunit beta-2                                       |
| SLC45A2    | Membrane-associated transporter protein                           |
| GPR143     | G-protein coupled receptor 143                                    |
| BLOC1S5    | Biogenesis of lysosome-related organelles complex 1 subunit 5     |
| BLOC1S6    | Biogenesis of lysosome-related organelles complex 1 subunit 6     |
| EPG5       | Ectopic P granules protein 5 homolog                              |
| GNAI1      | Guanine nucleotide-binding protein G(i) subunit alpha-1           |
| DTNBP1     | Dysbindin                                                         |
| RAB27A     | Ras-related protein Rab-27A                                       |
| ADAMTS20   | A disintegrin and metalloproteinase with thrombospondin motifs 20 |
| HTT        | Huntingtin                                                        |
| KDR        | Vascular endothelial growth factor receptor 1                     |
| KITLG      | Kit ligand                                                        |
| PDGFRA     | Platelet-derived growth factor receptor alpha                     |
| CIITA      | MHC class II transactivator                                       |
| ARPC5L     | Actin-related protein 2/3 complex subunit 5-like protein          |
| POMC       | Pro-opiomelanocortin (Fragment)                                   |
| KRT2       | Keratin, type II cytoskeletal 2 epidermal                         |
| CCT2       | T-complex protein 1 subunit beta                                  |
| CDC25A     | M-phase inducer phosphatase 1                                     |
| CREB3L2    | Cyclic AMP-responsive element-binding protein 3-like protein 2    |
| MYO10      | Unconventional myosin-X                                           |
| MYO6       | Unconventional myosin-VI                                          |
| MRAP/FALP  | Melanocortin-2 receptor accessory protein                         |
| MREG       | Melanoregulin                                                     |
| PIKFYVE    | 1-phosphatidylinositol 3-phosphate 5-kinase                       |
| POT1B      | Protection of telomeres protein 1                                 |
| VPS33A     | Vacuolar protein sorting-associated protein 33A                   |
| ACVR2A     | Activin receptor type-2A                                          |
| DICKKOPF-3 | Dickkopf-related protein 3                                        |
| EDN1       | Endothelin-1                                                      |
| EDN2       | Endothelin-2                                                      |
| EDN3       | Endothelin-3                                                      |
| CREB1      | Cyclic AMP-responsive element-binding protein 1                   |
| CTNNB1     | Catenin beta-1                                                    |
| ICAT       | Beta-catenin-interacting protein 1                                |
| DKK1       | Dickkopf-related protein 1                                        |
| ATRN       | Attractin                                                         |
| MGRN1      | E3 ubiquitin-protein ligase MGRN1                                 |
| GSK3beta   | Glycogen synthase kinase-3 beta                                   |
| Lef1       | Lymphoid enhancer-binding factor 1                                |
| MLPH       | Melanophilin                                                      |
| OCA2/P     | P protein                                                         |

---

|         |                                                               |
|---------|---------------------------------------------------------------|
| SLC24A5 | Sodium/potassium/calcium exchanger 5                          |
| SLC38A8 | Putative sodium-coupled neutral amino acid transporter 8      |
| LYST    | Lysosomal-trafficking regulator                               |
| BLOC1S3 | Biogenesis of lysosome-related organelles complex 1 subunit 3 |
| SCF     | Kit ligand                                                    |
| EDNRB   | Endothelin B receptor                                         |

Table S2 Primer List

| Gene  | Primer                                               | Length(bp) | Temperature of anneal |
|-------|------------------------------------------------------|------------|-----------------------|
| SCF-1 | F: AGCGAACCACAGAGGACATA<br>R:TTTACTGAGAGGGGGCATT     | 294        | 52°C                  |
| SCF-2 | F:TACAAAAGCGAACCACAGAGG<br>R:TGGAAACCCAAAATAACATCA   | 1184       | 52°C                  |
| SCF-3 | F:ATAACTCCCATACAAGACGG<br>R:GCAGAGACCCGTGGATGG       | 423        | 52°C                  |
| SCF-4 | F:GTGGGAAAGACAACAGAGTAAT<br>R:GACATTGGTAGAGCCAGCATTT | 326        | 55.1°C                |

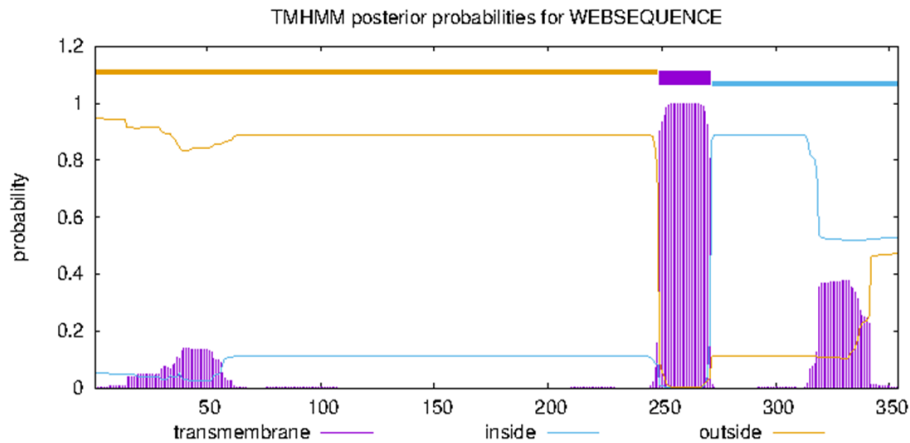

Figure S1 Structure prediction of SCF protein in sika deer outside, 1-248; Tmhelix, 249-271; inside, 272-354.
